# Supplementary material for: Development of Bi- and Tri-Layer Nanofibrous Membranes Based on the Sulfated Polysaccharide Carrageenan for Periodontal Tissue Regeneration
Source: MDPI journal article supplement (doi:10.3390/md21110565), 2023-10-28
Supplement: s1 [file s1]

# Supplementary Materials for

## Development of Bi- and Tri-Layer Nanofibrous Membranes based on the Sulfated Polysaccharide Carrageenan for Periodontal Tissue Regeneration

**Stefanos Kikionis <sup>1,†</sup>, Konstantina Iliou <sup>1,†</sup>, Aikaterini G. Karra <sup>2</sup>, Georgios Polychronis <sup>3</sup>, Ioannis Choinopoulos <sup>4</sup>, Hermis Iatrou <sup>4</sup>, George Eliades <sup>3</sup>, Efthymia Kitraki <sup>2</sup>, Ioulia Tseti <sup>5</sup>, Spiros Zinelis <sup>3</sup>, Efstathia Ioannou <sup>1</sup> and Vassilios Roussis <sup>1,\*</sup>**

<sup>1</sup> Section of Pharmacognosy and Chemistry of Natural Products, Department of Pharmacy, National and Kapodistrian University of Athens, Panepistimiopolis Zografou, 15771 Athens, Greece;

skikionis@pharm.uoa.gr (S.K.); ilioukonstantina@outlook.com (K.I.); eioannou@pharm.uoa.gr (E.I.)

<sup>2</sup> Department of Basic Sciences, School of Dentistry, National and Kapodistrian University of Athens, 11527 Athens, Greece; aikaterini.g.karra@gmail.com (A.K.); ekitraki@dent.uoa.gr (E.K.)

<sup>3</sup> Department of Biomaterials, School of Dentistry, National and Kapodistrian University of Athens, 11527 Athens, Greece; gpolisg@yahoo.gr (G.P.); geliad@dent.uoa.gr (G.E.); szinelis@dent.uoa.gr (S.Z.)

<sup>4</sup> Industrial Chemistry Laboratory, Department of Chemistry, National and Kapodistrian University of Athens, Panepistimiopolis Zografou, 15771 Athens, Greece; ichoinop@chem.uoa.gr (I.C.); iatrou@chem.uoa.gr (H.I.)

<sup>5</sup> Uni-Pharma S.A., 35 Kalyftaki Str., 14564 Kifissia, Greece; jtsetis@uni-pharma.gr (I.T.)

<sup>†</sup> These authors contributed equally to this work.

<sup>\*</sup> Correspondence: roussis@pharm.uoa.gr (V.R.)

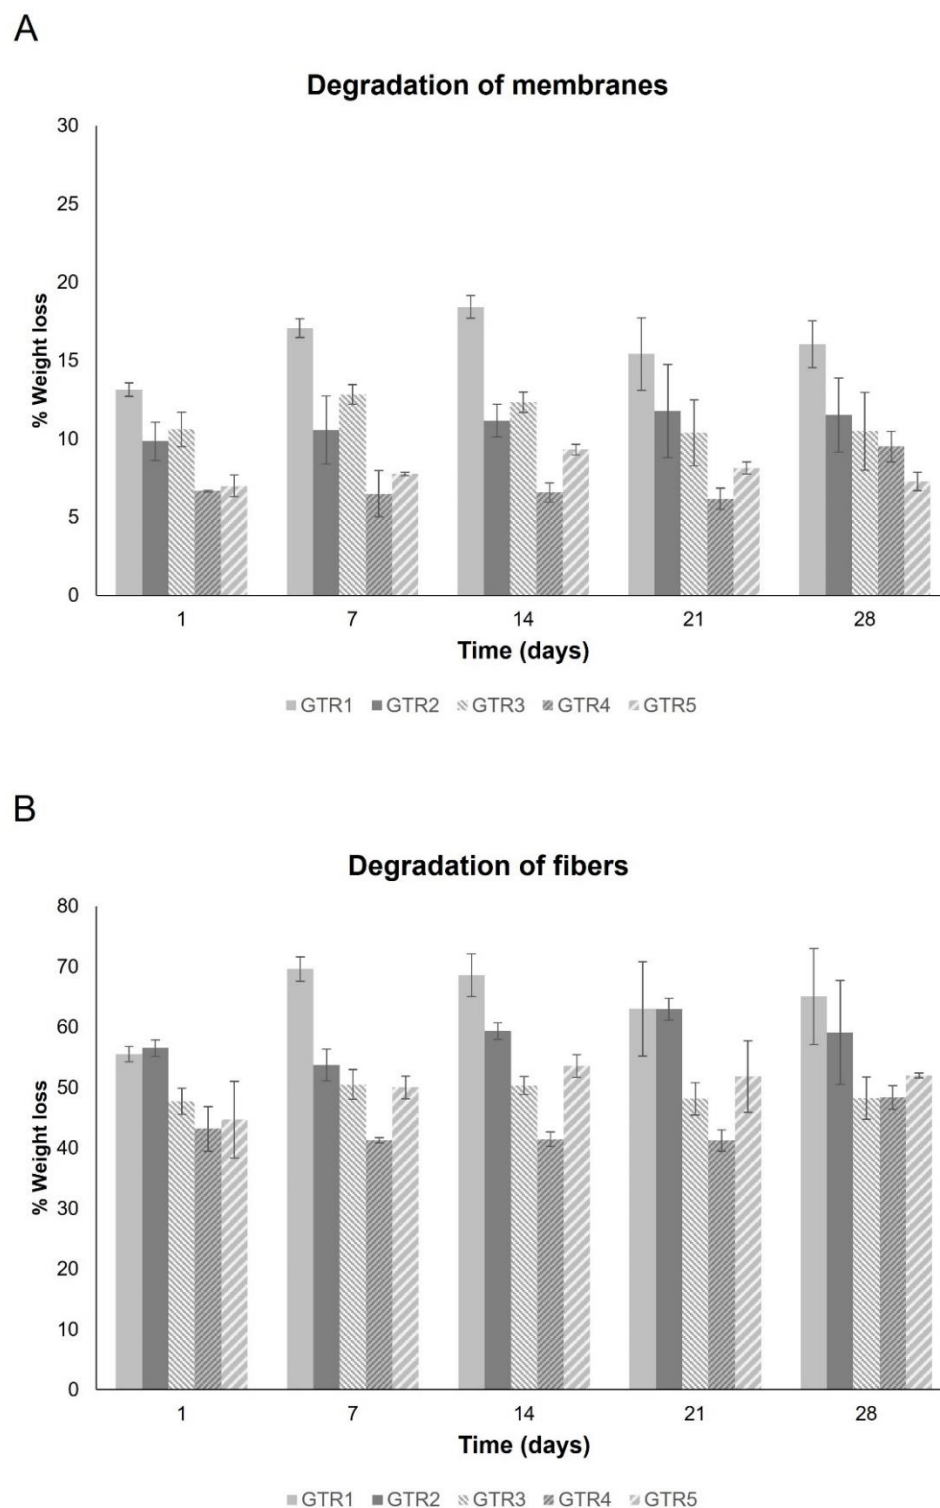

**Figure S1.** Degradation profiles of (A) GTR1, GTR2, GTR3, GTR4 and GTR5 membranes and (B) their fibrous layers.

**Table S1.** Statistical data for MTT results relating to the proliferation and growth of PDL cells. F and P values are provided for the one way ANOVA. Subsequent post hoc P values of the Dunnett t 2-sided test, refer to comparisons of GTR membrane groups with the Control group, for each time point. Statistical significance is accepted for  $p < 0.05$

| time point | F value              | p value | post hoc p values vs. CONTROL |       |       |       |       |       |
|------------|----------------------|---------|-------------------------------|-------|-------|-------|-------|-------|
|            |                      |         | GTR0                          | GTR1  | GTR2  | GTR3  | GTR4  | GTR5  |
| 12 H       | $F_{(6,20)} = 50.41$ | 0.000   | 0.000                         | 0.000 | 0.000 | 0.000 | 0.000 | 0.000 |
| 18H        | $F_{(6,20)} = 13.25$ | 0.000   | 0.000                         | 0.000 | 0.000 | 0.000 | 0.000 | 0.000 |
| DAY 1      | $F_{(6,20)} = 63.70$ | 0.000   | 0.000                         | 0.000 | 0.000 | 0.000 | 0.000 | 0.000 |
| DAY 2      | $F_{(6,20)} = 24.88$ | 0.000   | 0.000                         | 0.000 | 0.000 | 0.000 | 0.000 | 0.000 |
| DAY 3      | $F_{(6,20)} = 11.66$ | 0.000   | 0.000                         | 0.000 | 0.001 | 0.000 | 0.000 | 0.018 |
| DAY 4      | $F_{(6,20)} = 5.81$  | 0.003   | 0.002                         | 0.002 | 0.005 | 0.003 | 0.001 | 0.018 |
| DAY 7      | $F_{(6,20)} = 30.77$ | 0.000   | 0.000                         | 0.000 | 0.000 | 0.000 | 0.000 | 0.000 |

**Table S2.** Statistical data for qRT-PCR results. F and P values are provided for the one way ANOVA. Subsequent post hoc P values of the Dunnett t 2-sided test, refer to comparisons of GTR membrane groups with the control group, for each gene and time point. Statistical significance is accepted for  $p < 0.05$ .

| Gene - day   | F value               | p value      | post hoc p values vs. CONTROL |              |              |              |              |              |
|--------------|-----------------------|--------------|-------------------------------|--------------|--------------|--------------|--------------|--------------|
|              |                       |              | GTR0                          | GTR1         | GTR2         | GTR3         | GTR4         | GTR5         |
| ALP-DAY 3    | $F_{(5,35)} = 1.902$  | 0.125        | --                            | --           | --           | --           | --           | --           |
| ALP-DAY 7    | $F_{(5,38)} = 3.536$  | <b>0.012</b> | 1.000                         | 0.789        | 0.670        | 1.000        | 1.000        | 0.051        |
| OCN-DAY 3    | $F_{(5,40)} = 4.776$  | <b>0.002</b> | 0.997                         | <b>0.021</b> | <b>0.000</b> | <b>0.014</b> | 0.529        | 0.541        |
| OCN-DAY 7    | $F_{(5,41)} = 5.174$  | <b>0.001</b> | 1.000                         | <b>0.004</b> | 0.913        | 1.000        | 0.659        | 0.808        |
| RUNX2-DAY 3  | $F_{(5,37)} = 4.14$   | <b>0.005</b> | 0.995                         | <b>0.013</b> | 0.995        | 0.07         | 0.995        | 1.0          |
| RUNX2-DAY 7  | $F_{(5,39)} = 5.677$  | <b>0.001</b> | <b>0.025</b>                  | 0.991        | <b>0.002</b> | <b>0.001</b> | 0.225        | 0.979        |
| COL1A1-DAY 3 | $F_{(5,39)} = 7.571$  | <b>0.000</b> | <b>0.003</b>                  | 0.087        | <b>0.000</b> | <b>0.000</b> | <b>0.000</b> | 0.935        |
| COL1A1-DAY 7 | $F_{(5,39)} = 18.139$ | <b>0.000</b> | 0.231                         | 0.716        | <b>0.025</b> | <b>0.046</b> | 0.522        | <b>0.000</b> |

**Table S3.** Primers used for qRT-PCR analysis.

| Gene   | forward primers            | reverse primers               |
|--------|----------------------------|-------------------------------|
| gapdh  | 5'-TCTTCACCACCATGGAGAA-3'  | 5'-ACTGTGGTCATGAGCCCTT-3'     |
| ALP    | 5'-GACCTCCTCGGAAGACACTC-3' | 5'-TGAAGGGCTTCTTGTCTGTG-3'    |
| OCN    | 5'-CGCAGCCACCGAGACACCAT-3' | 5'-AGGGCAAGGGGAAGAGGAAAGAA-3' |
| RUNX2  | 5'-CCGCACGACAACCGCACCAT-3' | 5'-CGCTCCGGCCCCACAAATCTC-3'   |
| COL1A1 | 5'-TGCTCGTGGAATGATGGTG-3'  | 5'-CCTCGCTTTCCTTCCTCTCC-3'    |
